# Supplementary material
Source: PubMed Central journal article supplement (PMC5283610)
Supplement: NIHMS840997-supplement.pdf [file NIHMS840997-supplement.pdf]

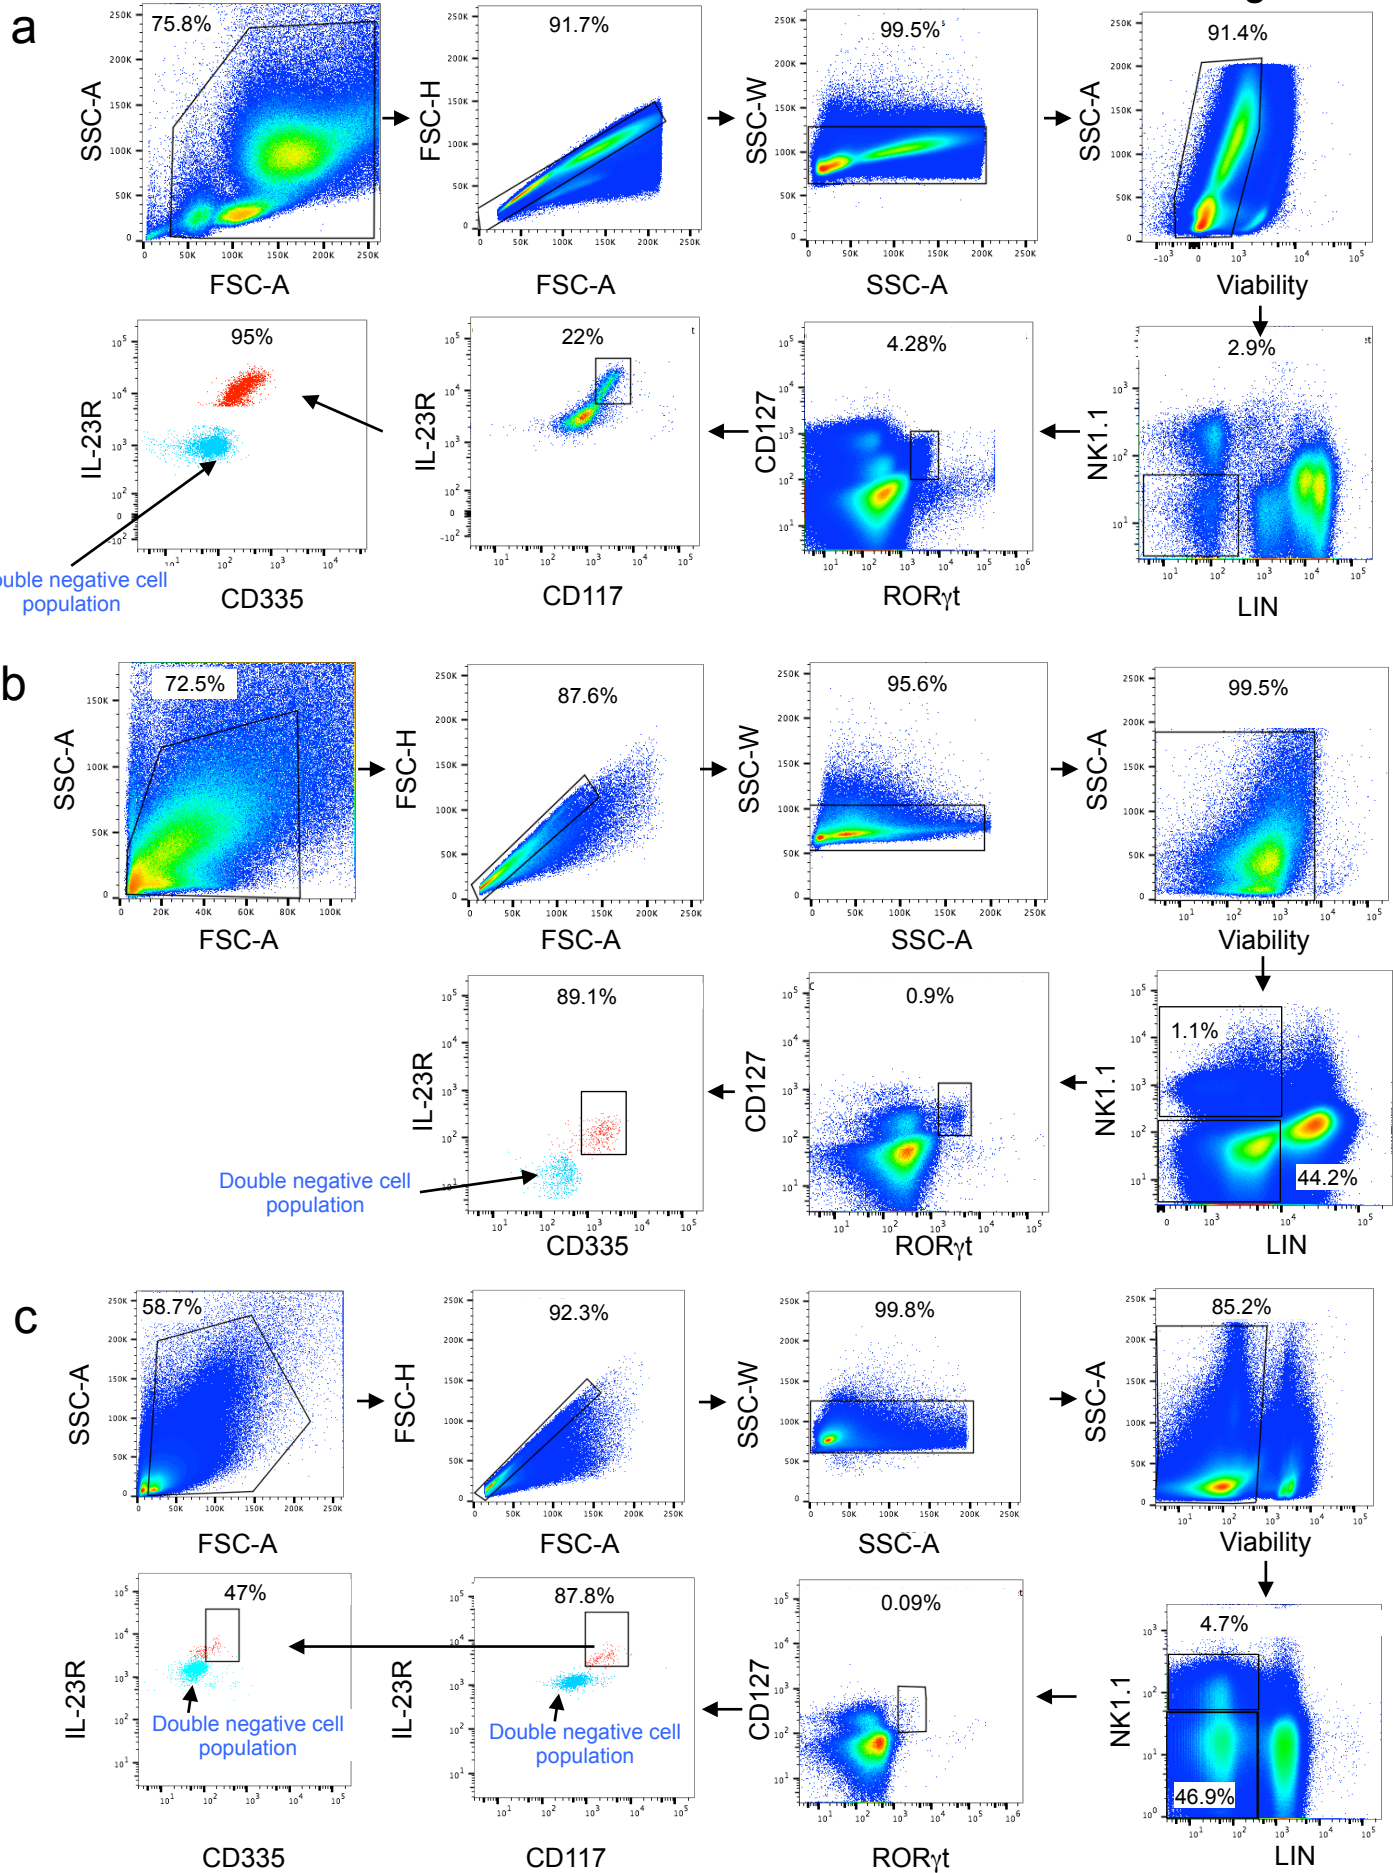

a

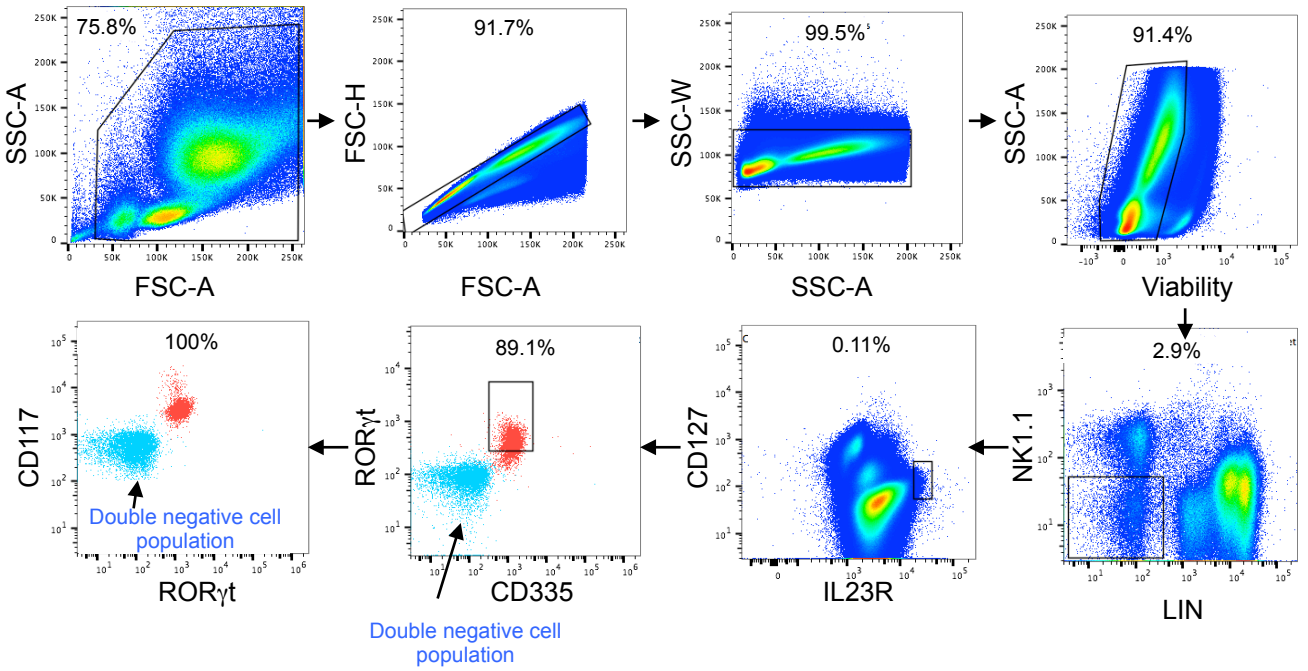

b

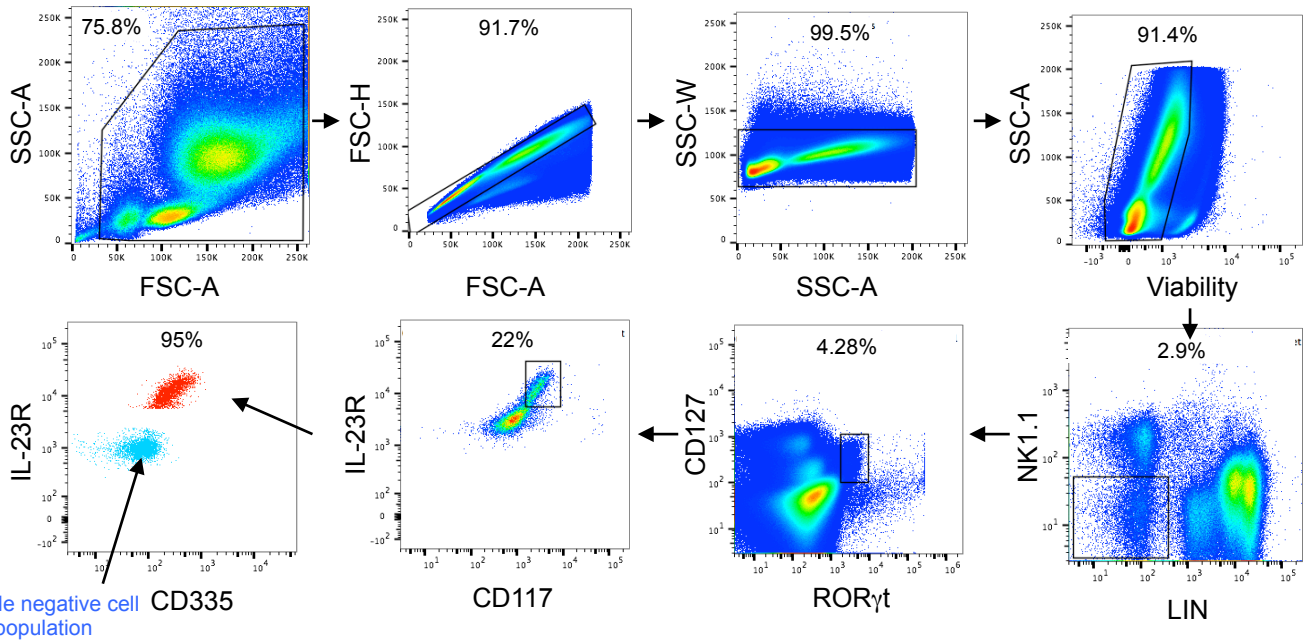

Figure S3

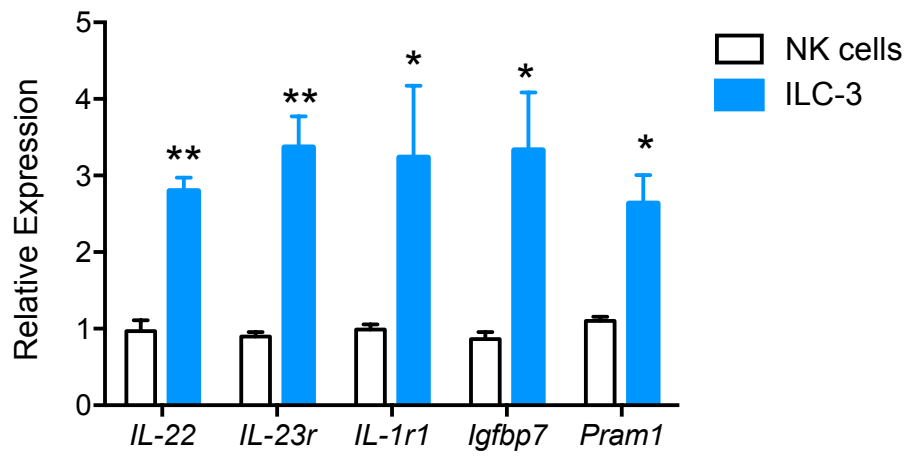

**a**

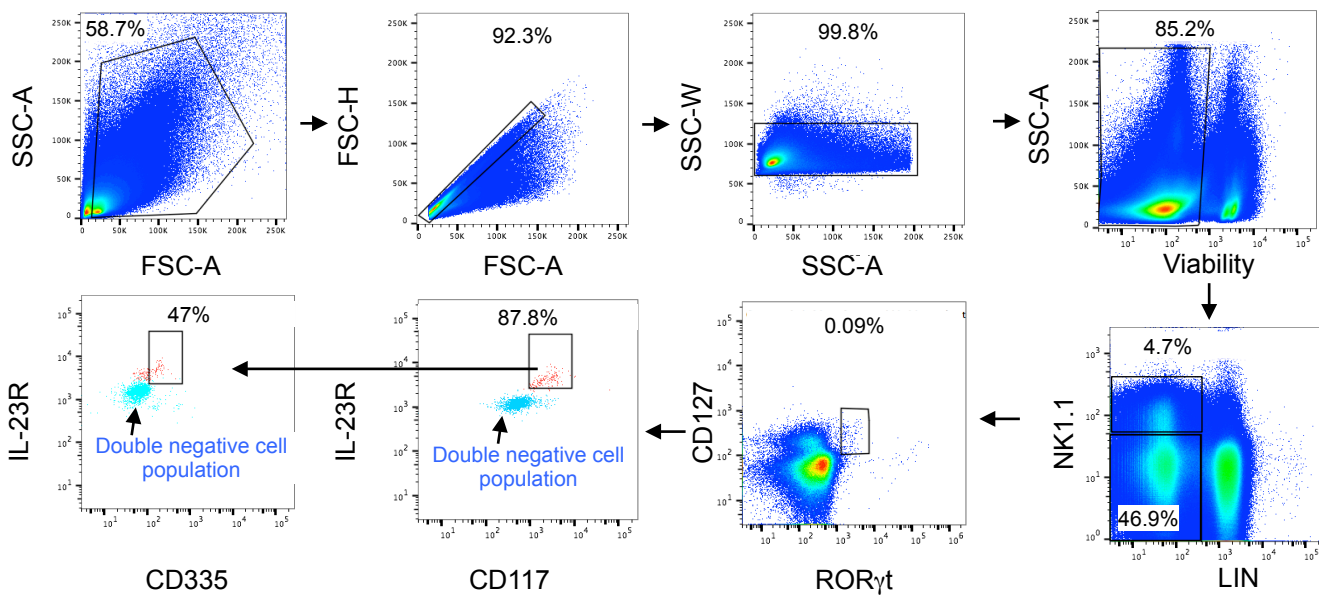

**b**

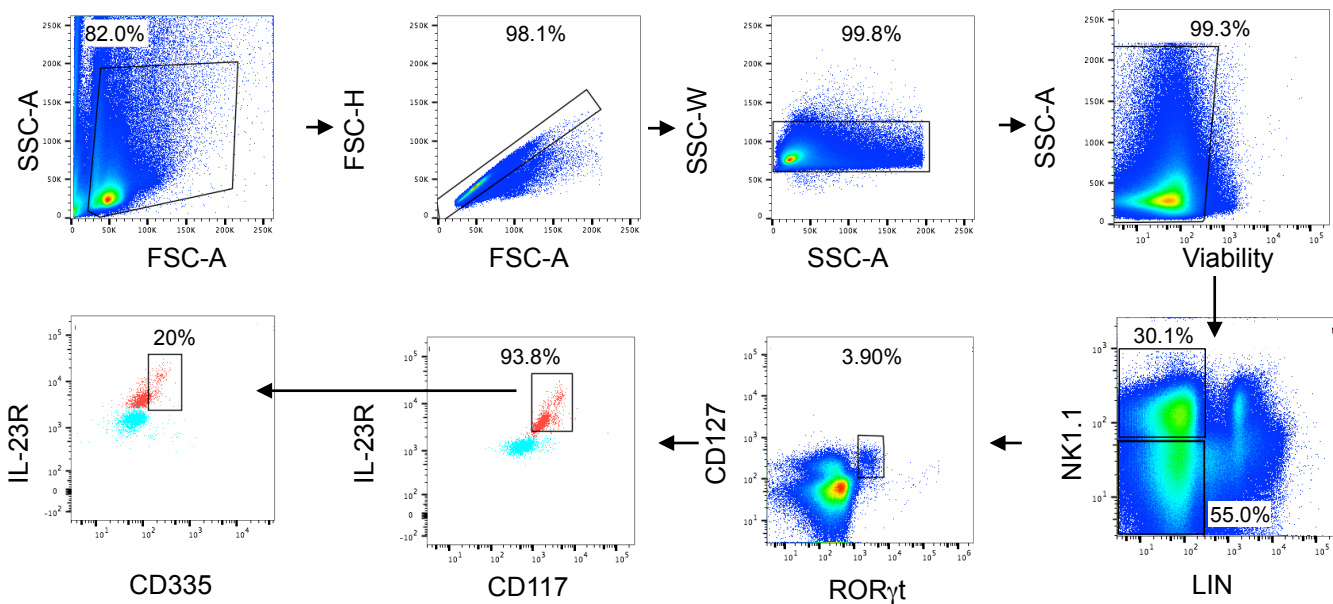

Figure S5

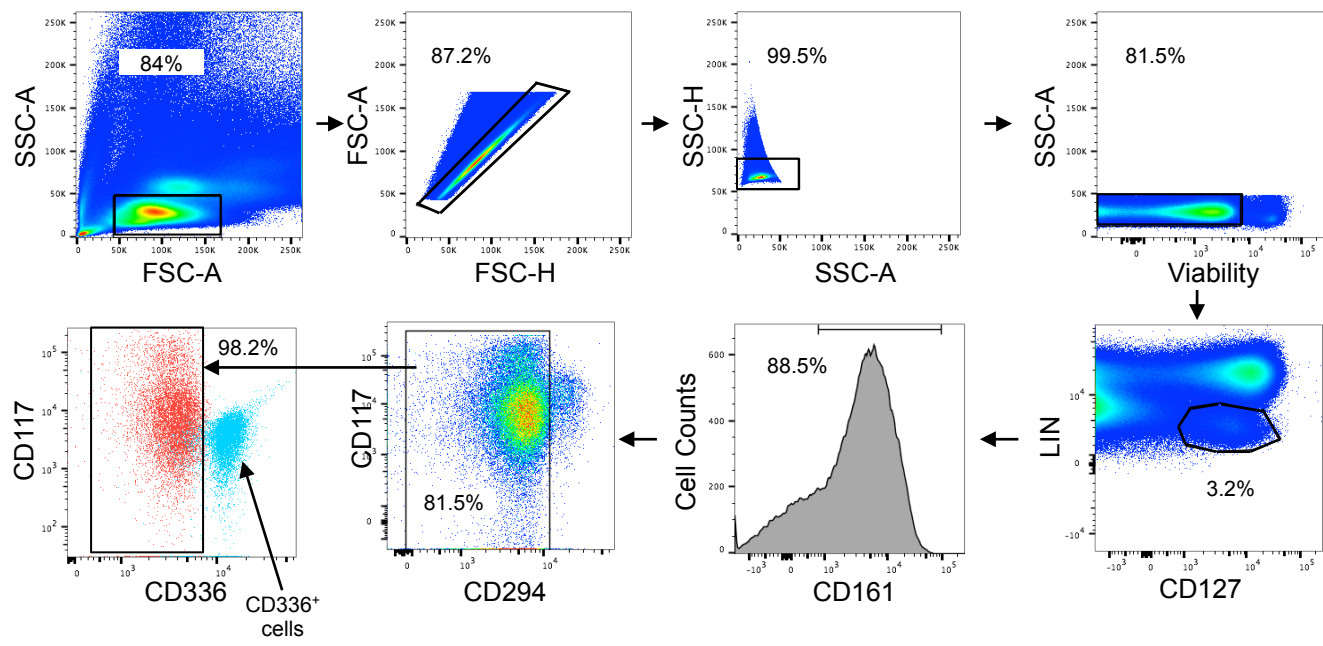

a

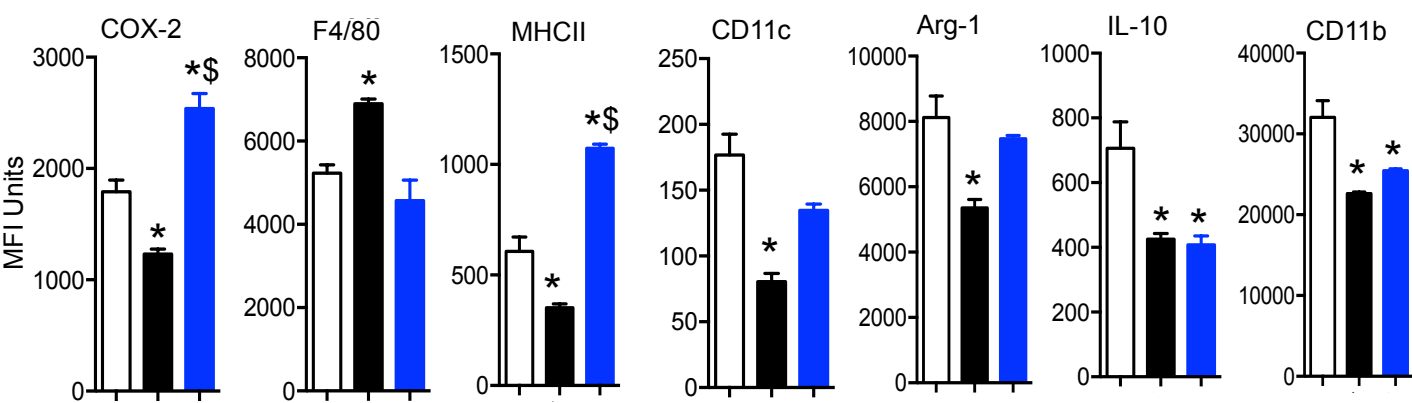

b

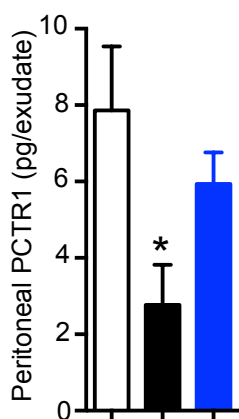

c

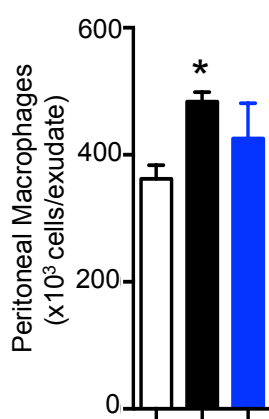

d

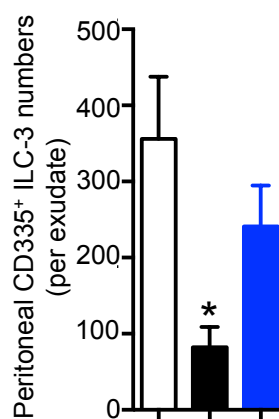

e

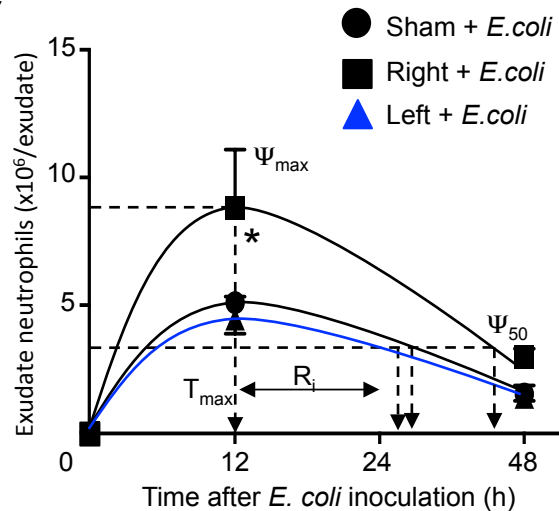

f

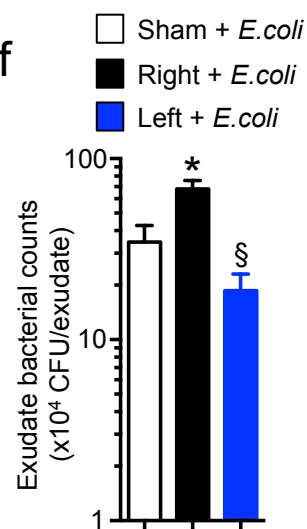

**Figure S1: Identification of peritoneal ILC-3 and comparison to intestinal and splenic ILC-3 populations.** Related to Figure 2

a) Peritoneal cells were collected by lavaging the peritoneum with 4 ml of PBS without  $\text{Ca}^{2+}$  and  $\text{Mg}^{2+}$ . Cells were then incubated with live/dead fixable dye, then with anti-CD32/CD18 antibodies prior to incubation with fluorescently labelled antibodies. Depicted is the gating strategy employed to identify the ILC-3 population with percentage values denoting the proportion of cells within the gate from the parent cell population. The staining was then evaluated using a BD FACS Aria flow cytometer and FlowJo software. ILC-3 were then identified using the following gating strategy: after gating for live, Lineage negative, NK1.1 low cells, cells were gated for RoR $\gamma$ t positive, CD127 positivity, then for CD117 positive IL-23R positive cells and finally the expression of CD335 was determined. A double negative population, denoted in blue was included in the last two panels for reference. Results are representative of n = 7 mice

b) Mouse intestines were collected from male FvB mice (6-8 weeks of age) and lamina propria lymphocytes were isolated following tissue digestion and Percoll isolation. Cells were then incubated with live/dead fixable dye, then with anti-CD32/CD18 antibodies prior to incubation with fluorescently labelled antibodies. Depicted is the gating strategy employed to identify the ILC-3 population with percentage values denoting the proportion of cells within the gate from the parent cell population. The staining was then evaluated using a BD FACS Aria flow cytometer and FlowJo software. ILC-3 were then identified using the following gating strategy: after gating for live, Lineage negative, NK1.1 low cells, cells were gated for RoR $\gamma$ t positive, CD127 positivity, then for CD335 positive IL-23R positive cells. In the last panel we also included a double negative population, denoted in blue for reference. Results are representative of n = 3 mice.

c) Mouse spleens were collected from male FvB mice (6-8 weeks of age) and gently dispersed using a 70  $\mu\text{m}$  cells strainer. (c) Cells were then stained as in panel a. Results are representative of n = 6 mice.

**Figure S2: Gating strategy employed for the sorting of peritoneal ILC-3: comparison with conventional ILC-3 gating strategy.** Related to Figure 2

Peritoneal lavages were collected from male FvB mice (6-8 weeks of age) and stained as in Figure S1a. (a) ILC-3 were then identified as Lineage negative, NK1.1 low cells, IL-23R and CD127 double positive cells were then gated for expression of CD335 expression. For validation purposes we also assessed the expression of RoR $\gamma$ t and CD117 in these cells were >89% of the cells were found to express these molecules (last two panels). (b) For comparison the conventional gating strategy outlined in Figure S1a. Results are representative of n = 6 mice. A double negative population, denoted in blue was included for reference.

**Figure S3: Upregulation of ILC-3 associated genes in peritoneal ILC-3 in comparison with peritoneal NK-cells.** Related to Figure 2

Peritoneal lavages were collected from male FvB mice (6-8 weeks of age) and stained as in Figure 1a and ILC-3 sorted as outlined in Figure 2b, were as NK cells were sorted as live/dead negative, Lineage negative and NK1.1 positive cells. RNA was extracted using an RNAeasy Micro Kit (Qiagen), reverse transcribed using a Qunatitect Reverse Transcription Kit (Qiagen) and the gene expression was assessed using Realtime qPCR. Results are mean  $\pm$  sem. n = 4 mice.

**Figure S4. Mice that underwent vagotomy of the left nerve display essentially identical host responses to peritoneal infections to sham mice.** Related to Figure 2

Mice were subjected to unilateral vagotomy of the right or left vagus or sham surgery, after 7 days (a-d) peritoneal lavages were obtained and (a) expression of macrophage phenotypic markers assessed using flow cytometry, (b) peritoneal PCTR1 levels assessed using lipid mediator metabololipidomics (c) peritoneal macrophage and (d) CD335+ ILC-3 counts assessed using flow cytometry and light microscopy. (e-f) Mice were inoculated with *E.coli* ( $1 \times 10^6$  CFU/mouse) and exudates collected at the indicated time intervals (e) Exudate neutrophil counts and resolution indices (f) exudate bacterial loads were determined at the 12h interval. Results are mean  $\pm$  sem of representative of n= 5 mice per group from two distinct experiments.

**Figure S5: Enrichment of splenic ILC-3 population for sorting and adoptive transfer experiments.** Related to Figure 6



Spleens were collected from male FvB mice (6-8 weeks of age) and gently dispersed using a 70 µm cells strainer. (a) Cells were then stained as in Figure S2a or (d) enriched using a mouse NK cell enrichment kit (Stemcell) following manufacturer's instructions and then incubated with a viability dye and fluorescently conjugated antibodies as in Figure S2a. Results are representative of n = 6 mice.

**Figure S6: Identification and sorting of human peripheral blood ILC-3.** Related to Figure 6

Human peripheral blood mononuclear cells were isolated from healthy volunteers, cell were enriched using a negative selection approach with a human NK cell enrichment kit (Stemcell) and stained with the denoted fluorescently labelled antibodies along with a live/dead fixable dye. ILC-3 were identified by gating on live, Lineage negative, CD127 high cells, from these the CD161 expressing cells were identified and then the CD294 negative, CD117 positive cells were gated as ILC-3. The expression of CD336 was also determined in this cell population. For reference a CD336 positive cell population was also included in the last panel and denoted in blue. Percentage values denote the subset of cells gated from the parent population. Results are representative 4 healthy volunteers.

**Supplemental Table 1. Temporal regulation of macrophage phenotypic markers in lavages from mice subjected to vagotomy.** Related to Figure 2.

| Macrophage markers | Sham  |   |        | Day 1 |   |        | Day 3 |   |        | Day 7 |   |        |
|--------------------|-------|---|--------|-------|---|--------|-------|---|--------|-------|---|--------|
|                    | Mean  | ± | S.E.M. |
| F4/80              | 5231  | ± | 231    | 3248  | ± | 143*   | 3321  | ± | 270*   | 6899  | ± | 129    |
| CD11b              | 32062 | ± | 2380   | 18173 | ± | 648*   | 14927 | ± | 880**  | 22605 | ± | 251*   |
| COX-2              | 1791  | ± | 122    | 1629  | ± | 121    | 1078  | ± | 41*    | 1232  | ± | 50**   |
| TGFβ               | 1840  | ± | 74     | 1313  | ± | 58*    | 932   | ± | 36*    | 1415  | ± | 71*    |
| Arg-1              | 8121  | ± | 756    | 6034  | ± | 297*   | 5004  | ± | 151*   | 5356  | ± | 295*   |
| MHCII              | 607   | ± | 75     | 291   | ± | 23**   | 349   | ± | 101*   | 352   | ± | 21**   |
| CD11c              | 177   | ± | 18     | 88    | ± | 16*    | 49    | ± | 4**    | 81    | ± | 7**    |
| IL-10              | 707   | ± | 94     | 423   | ± | 19*    | 326   | ± | 23**   | 426   | ± | 20**   |

Mice were subjected to vagotomy procedure. Peritoneal lavages were collected at indicated time point and the expression of macrophage phenotypic markers assessed using flow cytometry and expressed as Mean Fluorescent Intensity (MFI). Results are mean ± s.e.m.; n = 4 mice per groups. \* p < 0.05 and \*\* p < 0.01 vs macrophages from Sham mice.

**Supplemental Table 2. Temporal lipid mediator profile from isolated peritoneal macrophages from mice subjected to vagotomy procedure. Related to Figure 2.**

| DHA bioactive metabolome        | Q1  | Q3  | Peritoneal macrophages<br>Lipid mediators levels (pg/1x10 <sup>6</sup> macrophages) |   |      |       |   |        |       |   |       |
|---------------------------------|-----|-----|-------------------------------------------------------------------------------------|---|------|-------|---|--------|-------|---|-------|
|                                 |     |     | Sham                                                                                |   |      | Day 1 |   |        | Day 7 |   |       |
| RvD1                            | 375 | 233 | 5.8                                                                                 | ± | 0.5  | 1.1   | ± | 0.3 ## | 6.5   | ± | 1.0   |
| RvD2                            | 375 | 141 | 0.5                                                                                 | ± | 0.4  | 0.1   | ± | 0.1    | 0.5   | ± | 0.1   |
| RvD3                            | 375 | 147 | 0.2                                                                                 | ± | 0.1  | 0.4   | ± | 0.1    | 0.2   | ± | 0.1   |
| RvD4                            | 375 | 101 | 0.1                                                                                 | ± | 0.1  |       |   | *      |       |   | *     |
| RvD5                            | 359 | 199 | 2.2                                                                                 | ± | 0.6  | 1.1   | ± | 0.3    | 2.7   | ± | 0.8   |
| RvD6                            | 359 | 101 | 0.2                                                                                 | ± | 0.1  |       |   | *      |       |   | *     |
| 17R-RvD1                        | 375 | 141 | 0.1                                                                                 | ± | 0.1  |       |   | *      | 0.1   | ± | 0.1   |
| 17R-RvD3                        | 375 | 147 | 0.5                                                                                 | ± | 0.2  | 0.9   | ± | 0.2    | 0.8   | ± | 0.1   |
| PD1                             | 359 | 153 | 5.1                                                                                 | ± | 1.1  | 1.9   | ± | 0.7#   | 3.0   | ± | 1.5   |
| 17R-PD1                         | 359 | 153 | 3.9                                                                                 | ± | 0.9  | 1.7   | ± | 0.5#   | 2.5   | ± | 1.4   |
| 10S,17S-diHDHA                  | 359 | 153 | 24.3                                                                                | ± | 7.2  | 8.8   | ± | 2.3#   | 12.0  | ± | 4.5   |
| PCTR1                           | 650 | 231 | 10.3                                                                                | ± | 3.8  | 2.6   | ± | 0.5#   | 3.5   | ± | 2.2   |
| PCTR2                           | 521 | 231 | 0.2                                                                                 | ± | 0.1  |       |   | *      |       |   | *     |
| PCTR3                           | 464 | 231 | 0.2                                                                                 | ± | 0.1  | 0.4   | ± | 0.1    |       |   | *     |
| MaR1                            | 359 | 221 | 1.8                                                                                 | ± | 0.5  | 1.4   | ± | 0.6    | 1.0   | ± | 0.7   |
| 7S,14S-diHDHA                   | 359 | 221 | 1.3                                                                                 | ± | 0.3  | 0.7   | ± | 0.3    | 0.5   | ± | 0.4   |
| 4S,14S-diHDHA                   | 359 | 101 | 3.0                                                                                 | ± | 1.4  | 0.5   | ± | 0.2#   | 1.0   | ± | 0.7   |
| <b>EPA bioactive metabolome</b> |     |     |                                                                                     |   |      |       |   |        |       |   |       |
| RvE1                            | 349 | 161 | 0.3                                                                                 | ± | 0.1  | 0.3   | ± | 0.1    | 0.4   | ± | 0.1   |
| RvE2                            | 333 | 159 | 0.1                                                                                 | ± | 0.1  | 0.2   | ± | 0.1    | 0.1   | ± | 0.1   |
| RvE3                            | 333 | 201 | 0.3                                                                                 | ± | 0.1  |       |   | *      | 0.1   | ± | 0.1   |
| <b>AA bioactive metabolome</b>  |     |     |                                                                                     |   |      |       |   |        |       |   |       |
| LXA <sub>4</sub>                | 351 | 217 |                                                                                     |   | *    |       |   | *      |       |   | *     |
| LXB <sub>4</sub>                | 351 | 221 | 0.7                                                                                 | ± | 0.3  | 0.6   | ± | 0.2    | 0.5   | ± | 0.1   |
| 5S,15S-diHETE                   | 335 | 235 | 38.9                                                                                | ± | 8.8  | 20.1  | ± | 6.3#   | 17.1  | ± | 5.4#  |
| 15R-LXA <sub>4</sub>            | 351 | 217 | 0.3                                                                                 | ± | 0.3  |       |   | *      | 1.0   | ± | 0.9   |
| 15R-LXB <sub>4</sub>            | 351 | 221 | 5.0                                                                                 | ± | 0.4  | 5.8   | ± | 0.6    | 4.8   | ± | 0.4   |
| LTB <sub>4</sub>                | 335 | 195 | 3.9                                                                                 | ± | 1.0  | 1.3   | ± | 0.3#   | 1.8   | ± | 0.9   |
| 5S,12S-diHETE                   | 335 | 195 | 3.5                                                                                 | ± | 0.6  | 1.0   | ± | 0.5##  | 1.4   | ± | 0.8#  |
| 20-OH-LTB <sub>4</sub>          | 351 | 195 |                                                                                     |   | *    |       |   | *      |       |   | *     |
| LTC <sub>4</sub>                | 626 | 189 | 60.2                                                                                | ± | 7.3  | 30.7  | ± | 12.2   | 43.0  | ± | 11.4  |
| LTD <sub>4</sub>                | 497 | 189 | 0.3                                                                                 | ± | 0.1  | 0.9   | ± | 0.3    | 0.1   | ± | 0.1   |
| LTE <sub>4</sub>                | 440 | 189 | 0.7                                                                                 | ± | 0.1  | 0.3   | ± | 0.4    | 0.8   | ± | 0.2   |
| PGD <sub>2</sub>                | 351 | 189 | 3.8                                                                                 | ± | 0.2  | 2.9   | ± | 0.7    | 3.4   | ± | 1.0   |
| PGE <sub>2</sub>                | 351 | 189 | 93.6                                                                                | ± | 28.0 | 19.0  | ± | 5.3#   | 34.2  | ± | 17.1# |
| PGF <sub>2α</sub>               | 353 | 193 | 10.3                                                                                | ± | 2.4  | 3.1   | ± | 0.8#   | 7.1   | ± | 0.9   |
| TxB <sub>2</sub>                | 369 | 169 | 87.1                                                                                | ± | 12.7 | 25.7  | ± | 8.3##  | 32.6  | ± | 12.9# |

Mice were subjected to right vagotomy. Peritoneal lavages were collected at indicated time point, peritoneal macrophages isolated and LM levels were assessed using LM-metabololipidomics. Results are mean ± s.e.m.; n = 3 mice per group. \*, below limit, limit ≈ 0.1 pg. #p<0.05, ##p<0.01 vs Sham mice

**Supplemental Table 3. PCTR1 redresses the altered peritoneal macrophage phenotype in vagotomized mice. Related to Figure 4.**

| Macrophage markers | Sham         | Vagotomy + Vehicle         | Vagotomy + PCTR1           |
|--------------------|--------------|----------------------------|----------------------------|
| F4/80              | 7430 ± 883   | 10063 ± 649 <sup>#</sup>   | 7068 ± 485 <sup>††</sup>   |
| CD11b              | 32889 ± 2517 | 40366 ± 1185 <sup>##</sup> | 29631 ± 2387 <sup>††</sup> |
| COX-2              | 2384 ± 300   | 2735 ± 322                 | 2929 ± 189                 |
| TGFβ               | 6633 ± 98    | 5881 ± 151 <sup>##</sup>   | 6816 ± 662                 |
| Arg-1              | 1195 ± 104   | 798 ± 103 <sup>##</sup>    | 1106 ± 102 <sup>†</sup>    |
| MHCII              | 41447 ± 5507 | 25982 ± 5172 <sup>#</sup>  | 37835 ± 4347 <sup>†</sup>  |
| Tim 4              | 14463 ± 899  | 18362 ± 904 <sup>##</sup>  | 14678 ± 1061 <sup>††</sup> |
| iNOS               | 2611 ± 367   | 1823 ± 294                 | 2891 ± 272 <sup>††</sup>   |
| IL10               | 529 ± 98     | 493 ± 99                   | 651 ± 92                   |
| CD11c              | 408 ± 35     | 260 ± 29 <sup>#</sup>      | 458 ± 41 <sup>††</sup>     |

Mice were subjected to unilateral vagotomy or sham surgery, after 7 days vagotomised mice were administered vehicle (saline containing 0.01% EtOH) or PCTR1 (75ng/mouse) via i.p. injection. Sixteen hours later peritoneal cells were collected and macrophage phenotypic marker expression was assessed using flow cytometry and expressed as MFI. Results are mean ± s.e.m; n = 5-6 mice per group.

<sup>#</sup> p < 0.05 and <sup>##</sup> p < 0.01 vs Sham and <sup>†</sup> p < 0.05 and <sup>††</sup> p < 0.01 vs Vagotomy + Vehicle.

**Supplemental Table 4. PCTR1 rectifies the dysregulated peritoneal LM profiles in vagotomised mice. Related to Figure 4.**

| DHA bioactive metabolome        | Lipid mediators levels (pg/lavage) |     |              |                           |                               |  |
|---------------------------------|------------------------------------|-----|--------------|---------------------------|-------------------------------|--|
|                                 | Q1                                 | Q3  | Sham         | Vagotomy + Vehicle        | Vagotomy + PCTR1              |  |
| RvD1                            | 375                                | 215 | 1.8 ± 1.3    | 0.8 ± 0.5                 | 0.7 ± 0.5                     |  |
| RvD2                            | 375                                | 175 | 2.6 ± 1.3    | 2.5 ± 1.4                 | 3.3 ± 0.7                     |  |
| RvD3                            | 375                                | 191 | *            | *                         | 0.2 ± 0.1 <sup>##</sup>       |  |
| RvD5                            | 359                                | 199 | 3.1 ± 0.8    | 6.6 ± 5.8                 | 7.4 ± 3.5                     |  |
| RvD6                            | 359                                | 101 | 22.6 ± 18.9  | 18.6 ± 12.9               | 10.9 ± 6.8                    |  |
| 17R-RvD1                        | 375                                | 215 | 0.1 ± 0.1    | 0.1 ± 0.1                 | 0.2 ± 0.1                     |  |
| 17R-RvD3                        | 375                                | 191 | *            | *                         | *                             |  |
| PD1                             | 359                                | 153 | 5.9 ± 1.8    | 4.9 ± 4.1                 | 8.8 ± 2.0                     |  |
| 17R-PD1                         | 359                                | 153 | *            | *                         | *                             |  |
| PCTR1                           | 650                                | 231 | 21.3 ± 4.0   | 9.7 ± 3.0 <sup>#</sup>    | 19.7 ± 3.1 <sup>†</sup>       |  |
| PCTR2                           | 521                                | 231 | 12.4 ± 1.6   | 11.8 ± 2.5                | 4.4 ± 1.1 <sup>###,††</sup>   |  |
| PCTR3                           | 464                                | 231 | 18.6 ± 4.6   | 15.2 ± 5.2                | 74.5 ± 6.7 <sup>###,†††</sup> |  |
| MaR1                            | 359                                | 250 | 0.1 ± 0.1    | 0.4 ± 0.3                 | 0.1 ± 0.1                     |  |
| <b>EPA bioactive metabolome</b> |                                    |     |              |                           |                               |  |
| RvE1                            | 349                                | 161 | 10.3 ± 5.9   | 3.1 ± 0.9                 | 6.1 ± 1.7                     |  |
| RvE2                            | 333                                | 253 | 2.6 ± 0.8    | 3.8 ± 2.1                 | 2.9 ± 1.0                     |  |
| RvE3                            | 333                                | 245 | 1.7 ± 1.0    | 0.6 ± 0.3                 | 4.0 ± 1.6 <sup>†</sup>        |  |
| <b>AA bioactive metabolome</b>  |                                    |     |              |                           |                               |  |
| LXA <sub>4</sub>                | 351                                | 115 | 3.0 ± 2.2    | 1.9 ± 1.1                 | 0.5 ± 0.2                     |  |
| LXB <sub>4</sub>                | 351                                | 221 | 5.8 ± 3.7    | 2.3 ± 1.2                 | 2.8 ± 0.8                     |  |
| 5S,15S-diHETE                   | 335                                | 235 | 3.1 ± 0.7    | 3.9 ± 2.2                 | 4.0 ± 1.4                     |  |
| 15R-LXA <sub>4</sub>            | 351                                | 115 | 0.4 ± 0.2    | 0.1 ± 0.1                 | 1.4 ± 0.5 <sup>†</sup>        |  |
| 15R-LXB <sub>4</sub>            | 351                                | 221 | *            | *                         | *                             |  |
| LTB <sub>4</sub>                | 335                                | 195 | 5.6 ± 0.5    | 11.7 ± 2.4 <sup>#</sup>   | 5.9 ± 0.6 <sup>†</sup>        |  |
| LTC <sub>4</sub>                | 626                                | 189 | 132.0 ± 36.2 | 44.4 ± 13.9 <sup>#</sup>  | 43.3 ± 13.7 <sup>#</sup>      |  |
| LTD <sub>4</sub>                | 497                                | 189 | 4.3 ± 1.5    | 3.5 ± 2.2                 | 6.2 ± 2.6                     |  |
| LTE <sub>4</sub>                | 440                                | 189 | 33.0 ± 12.3  | 23.2 ± 7.1                | 28.7 ± 9.8                    |  |
| PGD <sub>2</sub>                | 351                                | 189 | 20.7 ± 7.1   | 52.1 ± 22.3               | 16.3 ± 4.8                    |  |
| PGE <sub>2</sub>                | 351                                | 189 | 128.8 ± 46.8 | 164.4 ± 84.3              | 119.6 ± 34.5                  |  |
| PGF <sub>2α</sub>               | 353                                | 193 | 4.0 ± 0.9    | 8.4 ± 1.9 <sup>#</sup>    | 4.0 ± 0.5 <sup>†</sup>        |  |
| TxB <sub>2</sub>                | 369                                | 169 | 81.9 ± 17.1  | 201.2 ± 63.2 <sup>#</sup> | 52.5 ± 19.9 <sup>†</sup>      |  |

Mice were subjected to unilateral vagotomy or sham surgery, after 7 days vagotomised mice were administered vehicle (saline containing 0.01% EtOH) or PCTR1 (75ng/mouse) via i.p. injection. Sixteen hours later peritoneal lavages were collected and LM profiles assessed using LM-metabololipidomics. Results are expressed as pg/lavage; mean ± s.e.m.; n = 5-6 mice per groups. # p < 0.05, ## p < 0.01 and ### p < 0.001 vs Sham and † p < 0.05, †† p < 0.01 and ††† p < 0.001 vs Vagotomy + Vehicle; \* = below limit, limit ≈ 0.1 pg. Q1, M-H (parent ion); and Q3, diagnostic ion in the MS-MS (daughter ion).

**Supplemental Table 5. Temporal lipid mediator profile in lavages from mice subjected to vagotomy procedure** Related to Figure 5.

| Macrophage markers | Sham  |          | Vagotomy |          | Vagotomy + Carbachol |          |
|--------------------|-------|----------|----------|----------|----------------------|----------|
|                    | Mean  | ± s.e.m. | Mean     | ± s.e.m. | Mean                 | ± s.e.m. |
| F4/80              | 5231  | ± 231    | 6899     | ± 129 #  | 7713                 | ± 1199   |
| CD11b              | 32062 | ± 2380   | 22605    | ± 251 #  | 24220                | ± 737    |
| COX-2              | 1791  | ± 122    | 1232     | ± 50 ##  | 2693                 | ± 233 ** |
| TGFβ               | 1840  | ± 74     | 1415     | ± 71 #   | 1678                 | ± 75     |
| Arg-1              | 8121  | ± 756    | 5356     | ± 295 #  | 10726                | ± 957    |
| MHCII              | 607   | ± 75     | 352      | ± 21 ##  | 1286                 | ± 69 **  |
| CD11c              | 177   | ± 18     | 81       | ± 7 #    | 157                  | ± 7 *    |
| IL-10              | 707   | ± 94     | 426      | ± 20 #   | 600                  | ± 73     |

Mice were subject to vagotomy or sham procedure. Mice were then given Vehicle(PBS) or Carbachol 0.1mg/Kg/day for 7 days and peritoneal lavages were collected and the expression of macrophage phenotypic markers assessed using flow cytometry and expressed as Mean Fluorescent Intensity (MFI). Results are mean ± s.e.m.; n = 4 mice per groups. # p < 0.05 and ## p < 0.01 vs macrophages from Sham mice. \* p < 0.05 and \*\* p < 0.01 vs macrophages from vagotomized mice

**Supplemental Table 6. ILC-3 depletion alters peritoneal lipid mediator profile and macrophage phenotype. Related to Figure 5.**

a

| DHA bioactive metabolome        | Lipid mediators levels (pg/lavage) |     |         |         |             |                     |
|---------------------------------|------------------------------------|-----|---------|---------|-------------|---------------------|
|                                 | Q1                                 | Q3  | Isotype |         | Anti-CD90.2 |                     |
| RvD1                            | 375                                | 215 | 6.1     | ± 3.5   | 12.5        | ± 7.6               |
| RvD2                            | 375                                | 175 | 70.5    | ± 46.4  | 151.2       | ± 89.3              |
| RvD3                            | 375                                | 191 | 3.1     | ± 1.5   | 6.5         | ± 3.8               |
| RvD5                            | 359                                | 199 | 131.1   | ± 100.2 | 264.4       | ± 152.8             |
| RvD6                            | 359                                | 101 | 1.7     | ± 1.0   | 3.2         | ± 1.8               |
| AT-RvD1                         | 375                                | 215 | 12.9    | ± 8.2   | 21.1        | ± 12.4              |
| AT-RvD3                         | 375                                | 191 | 5.6     | ± 3.6   | 15.4        | ± 9.2               |
| PD1                             | 359                                | 153 | 15.5    | ± 4.8   | 28.4        | ± 15.5              |
| AT-PD1                          | 359                                | 153 | 13.6    | ± 3.7   | 18.3        | ± 9.1               |
| PCTR1                           | 650                                | 231 | 13.2    | ± 3.5   | 2.9         | ± 0.9 <sup>#</sup>  |
| PCTR2                           | 521                                | 231 | 7.5     | ± 1.9   | 1.0         | ± 0.4 <sup>##</sup> |
| PCTR3                           | 464                                | 231 | 2.6     | ± 0.5   | 0.2         | ± 0.1 <sup>##</sup> |
| MaR1                            | 359                                | 250 | 3.2     | ± 2.6   |             | *                   |
| <b>EPA bioactive metabolome</b> |                                    |     |         |         |             |                     |
| RvE1                            | 349                                | 161 | 6.8     | ± 1.8   | 15.7        | ± 7.3               |
| RvE2                            | 333                                | 253 | 19.9    | ± 12.7  | 37.6        | ± 20.6              |
| RvE3                            | 333                                | 245 | 5.7     | ± 3.8   | 6.9         | ± 4.0               |
| <b>AA bioactive metabolome</b>  |                                    |     |         |         |             |                     |
| LXA <sub>4</sub>                | 351                                | 115 | 2.9     | ± 2.1   | 7.3         | ± 4.6               |
| LXB <sub>4</sub>                | 351                                | 221 | 16.1    | ± 9.4   | 36.2        | ± 21.9              |
| 5S,15S-diHETE                   | 335                                | 235 | 123.2   | ± 73.3  | 230.0       | ± 133.5             |
| AT-LXA <sub>4</sub>             | 351                                | 115 | 6.2     | ± 3.5   | 10.3        | ± 5.4               |
| AT-LXB <sub>4</sub>             | 351                                | 221 | 1.3     | ± 0.8   | 2.1         | ± 1.3               |
| LTB <sub>4</sub>                | 335                                | 195 | 3.2     | ± 1.9   | 2.5         | ± 1.6               |
| LTC <sub>4</sub>                | 626                                | 189 | 36.7    | ± 18.4  | 7.8         | ± 2.9               |
| LTD <sub>4</sub>                | 497                                | 189 | 14.9    | ± 4.5   | 2.9         | ± 1.5               |
| LTE <sub>4</sub>                | 440                                | 189 | 11.3    | ± 6.5   | 12.9        | ± 6.6               |
| PGD <sub>2</sub>                | 351                                | 189 | 59.1    | ± 29.7  | 64.5        | ± 34.3              |
| PGE <sub>2</sub>                | 351                                | 189 | 369.3   | ± 192.9 | 532.9       | ± 337.8             |
| PGF <sub>2α</sub>               | 353                                | 193 | 32.8    | ± 16.2  | 31.2        | ± 16.0              |
| TxB <sub>2</sub>                | 369                                | 169 | 120.2   | ± 43.0  | 113.5       | ± 54.1              |

Rag1<sup>-/-</sup> mice were administered an anti-CD90.2 (250µg/mouse) or Isotype control (250µg/mouse) antibody. Peritoneal lavages were collected after 3 days and LM levels were assessed using LM-metabololipidomics. Results are expressed as pg/lavage; mean ± s.e.m.; n = 4 per group. <sup>#</sup> p < 0.05, <sup>##</sup> p < 0.01 vs Isotype mice; \* = below limit, limit ≈ 0.1 pg. Q1, M-H (parent ion); and Q3, diagnostic ion in the MS-MS (daughter ion).

**b**

| <b>Macrophage markers</b> | <b>Isotype</b> |        | <b>Anti-CD90.2</b> |                     |
|---------------------------|----------------|--------|--------------------|---------------------|
| F4/80                     | 34601          | ± 1330 | 41457              | ± 2113 <sup>#</sup> |
| CD11b                     | 33357          | ± 3762 | 25995              | ± 1963              |
| COX-2                     | 386            | ± 31   | 478                | ± 42                |
| TGFβ                      | 1601           | ± 475  | 768                | ± 236               |
| Arg-1                     | 232            | ± 25   | 184                | ± 6                 |
| MHCII                     | 575            | ± 40   | 460                | ± 48                |
| Tim 4                     | 13666          | ± 664  | 16769              | ± 503 <sup>##</sup> |
| iNOS                      | 307            | ± 40   | 222                | ± 12 <sup>#</sup>   |

Rag1<sup>-/-</sup> mice were administered an anti-CD90.2 (250µg/mouse) or Isotype control (250µg/mouse) antibody. Peritoneal cells were collected after 3 days and macrophage markers were assessed using flow cytometry and expressed as Mean Fluorescent Intensity (MFI). Results are mean ± s.e.m.; n = 4 per group; <sup>#</sup> p < 0.05 and <sup>##</sup> p < 0.01 vs Isotype.



## Supplemental Methods

### Bacterial Phagocytosis and Loads

To assess **bacterial phagocytosis** in peritoneal exudate leukocytes, exudate cells were incubated with PerCP-Cy5.5-conjugated anti-mouse CD11b antibody (30 min, 4°C, in staining solution), then fixed and permeabilized using BD Perm/Wash™ Buffer (BD Biosciences) following manufacturer's instructions and incubated with FITC-conjugated anti-*E. coli* antibody (GenTex, 30 min, 4°C, in BD Perm/Wash™ Buffer). **Bacterial counts** in peripheral blood and inflammatory exudates were determined by overnight cultures (37°C) of serially diluted samples on LB agar plates. In select experiments mice were given PCTR1 75ng/mouse or vehicle (Saline containing 0.01% EtOH) *via i.p.* injection 16h prior to *E. coli* inoculation, then lavages were collected at determined time intervals and processed as outlined above.

### Exudate Acetylcholine

Acetylcholine concentrations were determined using a commercially available ELISA (Abcam) following manufacturer's instructions. Briefly total levels of acetylcholine and choline were determined in peritoneal lavages by converting the acetylcholine to choline and measuring total choline amounts. The choline levels were then determined separately and the levels of acetylcholine levels were ascertained by subtracting the total choline levels from the free choline levels.

### ILC3 transfer experiments

In determined experiment human ILC3 ( $1 \times 10^3$  cells/200µl) or mouse ILC3 ( $5 \times 10^2$  cells/200µl) isolated using the antibody combinations and sorting strategies described in Figures S4 and S6) were incubated with baicalin (10µM; lipoxygenase inhibitor) or vehicle (37°C, 20 min, saline) then with DHA (1µM) and ACh (1nM, 45 min, 37°C). These

incubations were then injected to FvB mice (male, 6-8 weeks of age) 7 day after unilateral vagotomy. After 3h mice were inoculated with *E. coli* ( $1 \times 10^6$  CFU/mice) and cell composition, bacterial phagocytosis, and bacterial counts were established at determined intervals as outlined above.

### **Antibody mediated depletion of ILC3s**

In select experiments *Rag1*<sup>-/-</sup> (male, 6-8 weeks, Jackson Laboratories, fed lab diet containing essential fatty acids as from supplier) were injected with an anti-CD90.2 (250 µg/mouse; clone: 30H12, BioXcell;) or Isotype control (250 µg/mouse; BioXcell) antibody. 3 days later peritoneal lavages were obtained at 0 h or peritonitis was initiated by i.p. injection with *E. coli* (serotype O6:K2:H1;  $1 \times 10^5$  colony forming units CFU/mouse). Cell composition, bacterial phagocytosis, and bacterial counts were established at determined intervals as above.

### **Realtime PCR.**

Human and mouse ILC3 sorted using the antibody combinations outlined above and in Figure S3 were centrifuged and resuspended in RTL Buffer. RNA was isolated using Qiagen RNEasy Micro kits following manufacturers instructions, cDNA was obtained using Superscript III reverse transcriptase (Invitrogen) and the expression of human GAPDH and 15-LOX type 1 was investigated using QuantiTect Primer Assays, RT2 SYBR® Green Mastermix, and Stratagene real-time PCR machine (model Mx 3005; Stratagene). Expression of mouse *Chrm1*, *Chrm2*, *Chrm3*, *Chrm4*, *Chrm5*, *Chrma4*, *Chrma7*, *Chrmb4*, *Il-22*, *Il-23r*, *Il-1r1*, *Igfbp7*, *Pram1* and *GAPDH* was assessed as described above.

## **Confocal Staining**

Omenta were surgically removed from mice; these were placed immediately in 4% paraformaldehyde and kept for 15 min at room temperature. After fixing, the omenta were washed twice in PBS and 0.1% Tween 20 buffer for 2h at room temperature then in blocking solution (PBS containing 10% goat serum, 5% bovine serum albumin and 2 mM EDTA) for 4h at room temperature. Tissues were then incubated in blocking solution with anti-choline acetyltransferase (ChAt; Abcam, cat no: ab6168) overnight at 4°C. The tissues were then washed in PBS and incubated with donkey anti-rabbit Alexa Fluor-594 conjugated antibody (Biolegend; cat no: 406418) for 7h at 4°C. Tissues were washed in PBS and then incubated in permeabilization buffer (eBioscience) with BV421-anti-F4/80 (clone: BM8), Alexa Fluor-anti-CD3 (clone: 17A2) and Alexa Fluor-647-anti-ROR $\gamma$ t (clone: Q21-559; BD Bioscience) overnight at 4°C. The omenta were then washed and mounted in Mowiol® (10-98 Mw ~61,000; Sigma Aldrich) and imaged using a Zeiss LSM 710 confocal microscope, images were processed using Zen 2009 and ImageJ software.
